# Supplementary material for: A highly active worm-like PtMo nanowire for the selective synthesis of dibenzylamines
Source: Royal Society of Chemistry journal article supplement (doi:10.1039/c8ra00787j), 2018-01-01

## *Supporting information*

# Highly Active wormlike PtMo Nanowire in the Selective Synthesis of Dibenzylamines

*Shuanglong Lu, Pengyao Xu, Xueqin Cao, Hongwei Gu\**

Key Laboratory of Organic Synthesis of Jiangsu Province, College of Chemistry,  
Chemical Engineering and Materials Science & Collaborative Innovation Center of  
Suzhou Nano Science and Technology, Soochow University, Suzhou 215123, P.R.  
China

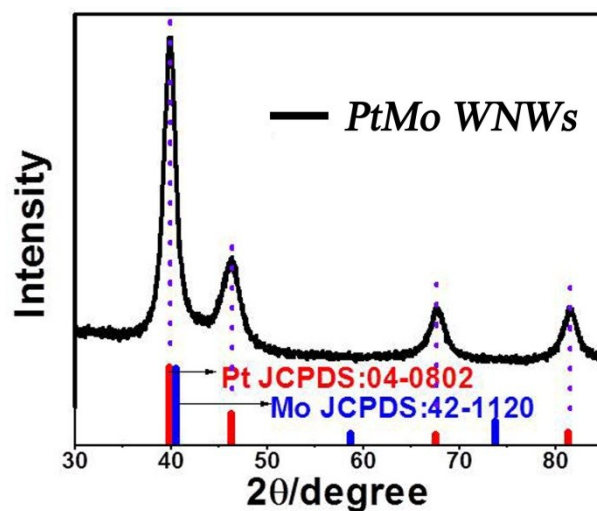

Figure S1. XRD spectra of the PtMo WNWs.

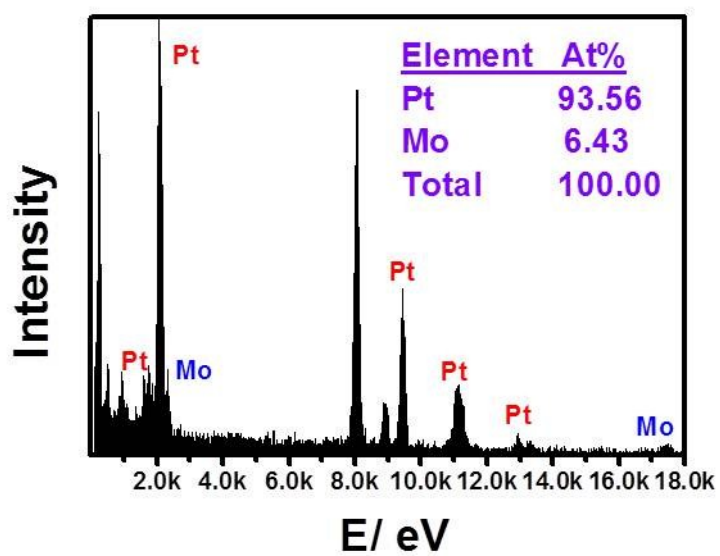

Figure S2. EDS spectra of the PtMo WNWs.

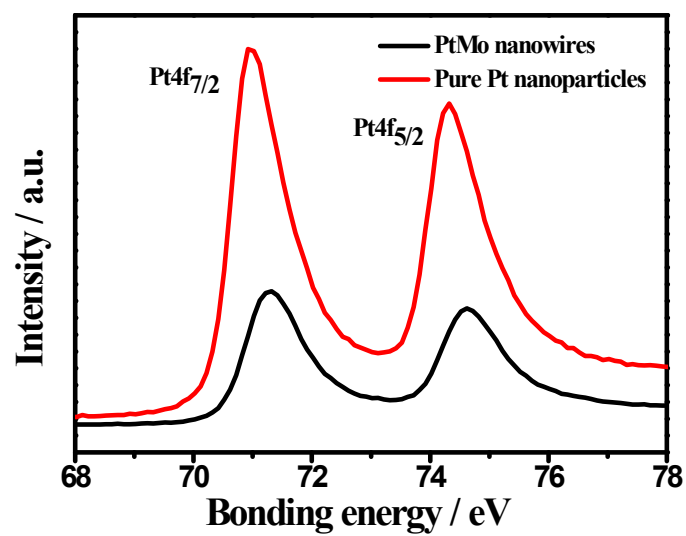

Figure S3. XPS spectra of the PtMo nanowires and Pt nanoparticles.

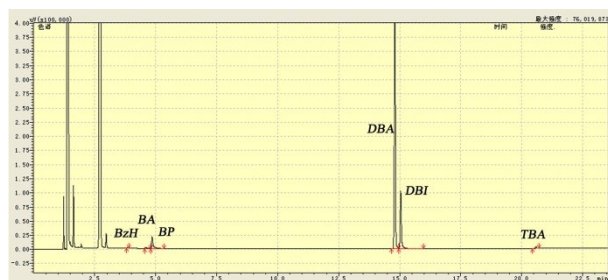

Figure S4. GC spectra of the reductive amination of BzH

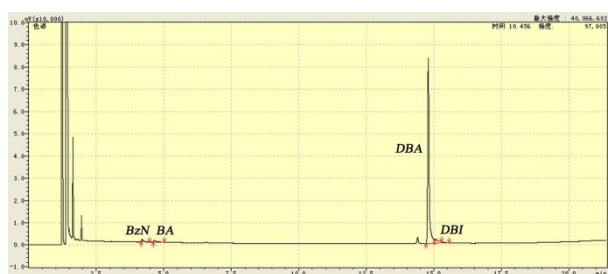

Figure S5. GC spectra of the reductive amination of BzN

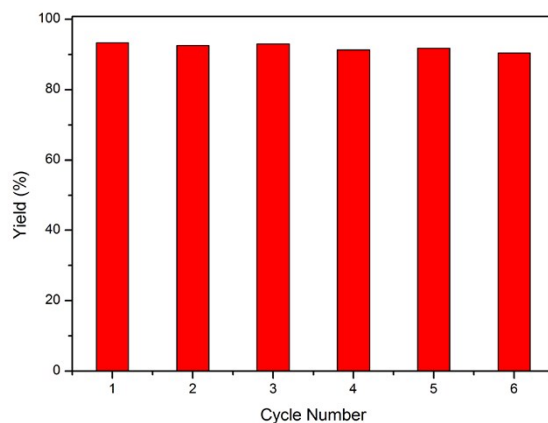

**Figure S6.** Catalytic stability of Pt nanowires: BzH (1.0 mmol), 25% aqueous ammonia (2 equiv.), *m*-xylene (2 mL), 1 bar H<sub>2</sub>, 100°C, 0.5 mol% PtMo WNWs for 24 h.

**Table S1.** Reductive amination for different molar ratios of BzH to ammonia <sup>a</sup>

| Entry | Ammonia (equiv.) | Conv. (%) <sup>b</sup> | Yield. (%) <sup>b</sup> |      |     |      |      |
|-------|------------------|------------------------|-------------------------|------|-----|------|------|
|       |                  |                        | BA                      | BP   | DBI | DBA  | TBA  |
| 1     | 0                | 99.0                   | --                      | 99.0 | --  | --   | --   |
| 2     | 0.5              | 79.9                   | --                      | 3.8  | 9.6 | 62.4 | 4.1  |
| 3     | 1                | 100                    | 1.4                     | --   | 2.6 | 94.6 | 1.5  |
| 4     | 2                | 100                    | 0.7                     | 0.5  | 0.8 | 96.1 | 0.8  |
| 5     | 5                | 100                    | --                      | 18.1 | 1.2 | 56.9 | 23.8 |

<sup>a</sup> Reaction conditions: BzH (1.0 mmol), and *m*-xylene (2 mL) at 1 bar H<sub>2</sub>, 100°C, with 0.5 mol% PtMo WNWs for 24 h. <sup>b</sup> GC yield.

**Table S2.** Control experiments dealing with the PtMo WNWs catalyzed system <sup>a</sup>

| Entry          | Catalyst  | H <sub>2</sub> (bar) | Conv. (%) <sup>b</sup> | Yield. (%) <sup>c</sup> |    |      |      |      |
|----------------|-----------|----------------------|------------------------|-------------------------|----|------|------|------|
|                |           |                      |                        | BA                      | BP | DBI  | DBA  | TBA  |
| 1              | --        | 1                    | 0                      | --                      | -- | --   | --   | --   |
| 2              | PtMo WNWs | --                   | 0                      | --                      | -- | --   | --   | --   |
| 3              | Pt/C      | 1                    | 100                    | --                      | -- | 1.7  | 55.5 | 42.8 |
| 4 <sup>b</sup> | Pt/C      | 1                    | 96.8                   | --                      | -- | 10.1 | 24.3 | 52.8 |

<sup>a</sup> Reaction conditions: BzH (1.0 mmol), and *m*-xylene (2 mL) at 1 bar H<sub>2</sub>, 100°C, with 0.5 mol% catalyst for 24 h. <sup>b</sup> BzN (1.0 mmol) and ethanol (2 mL) at 1 bar H<sub>2</sub>, 80°C, with 0.5 mol% Pt/C WNWs for 24 h. <sup>c</sup> GC yield.

**Table S3.** Comparison of the catalytic activities using Pt nanoparticles and Pt nanorods

| Entry | Catalyst            | Conv. (%) | Select. (%) <sup>b</sup> |      |      |
|-------|---------------------|-----------|--------------------------|------|------|
|       |                     |           | BA                       | DBA  | DBI  |
| 1     | Pt NPs <sup>1</sup> | 88.7      | -                        | 74.9 | 22.0 |
| 2     | Pt NRs <sup>2</sup> | 100       | -                        | 89.0 | 6.0  |

[1] Wang, C.; Hou, Y. L.; Kim, J.; Sun, S. H. *Angew. Chem. Int. Ed.* **2007**, *46*, 6333.

[2] Kim J.; Lee Y.; Sun S. H. *J. Am. Chem. Soc.*, **2010**, *132*, 4996.

**NMR analysis for the DBA products:**

*dibenzylamine: <sup>1</sup>H NMR*

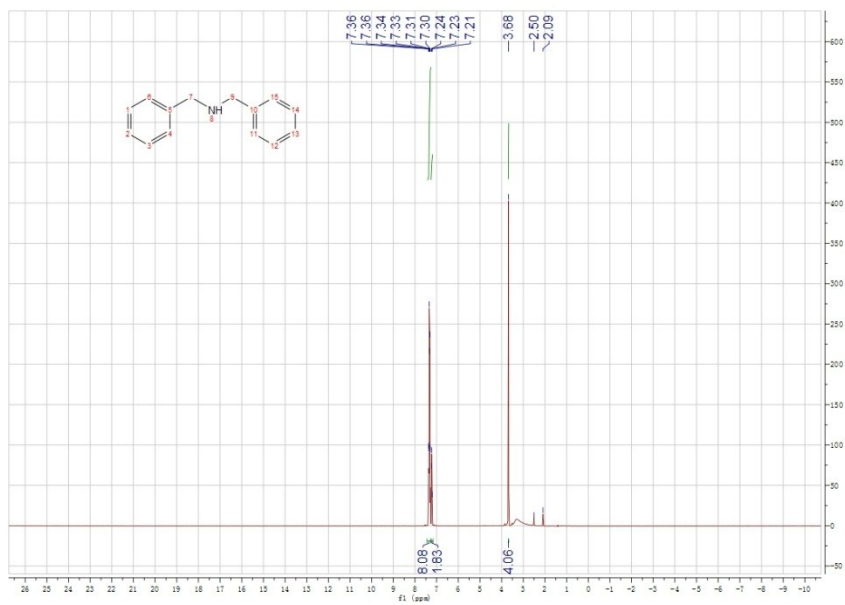

*dibenzylamine: <sup>13</sup>C NMR*

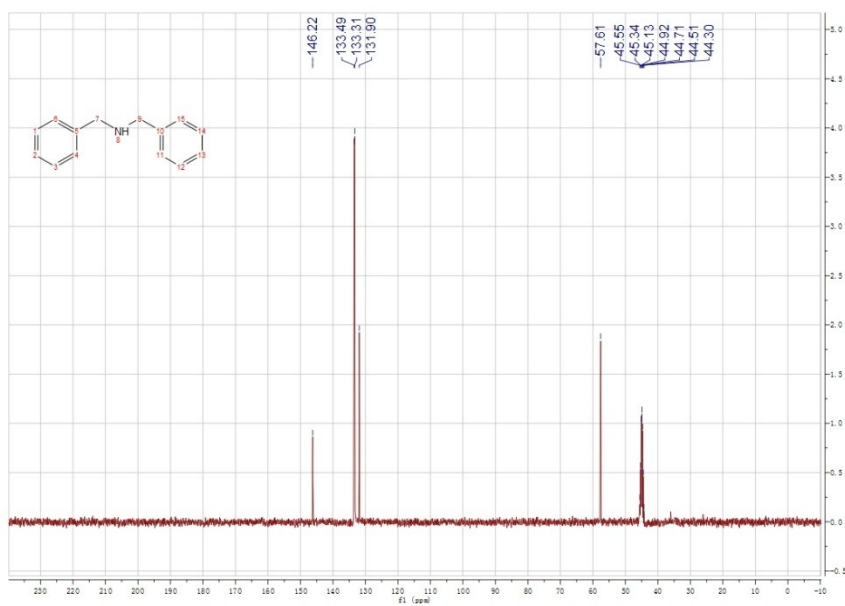

*di(2-methyl)benzylamine: <sup>1</sup>H NMR*

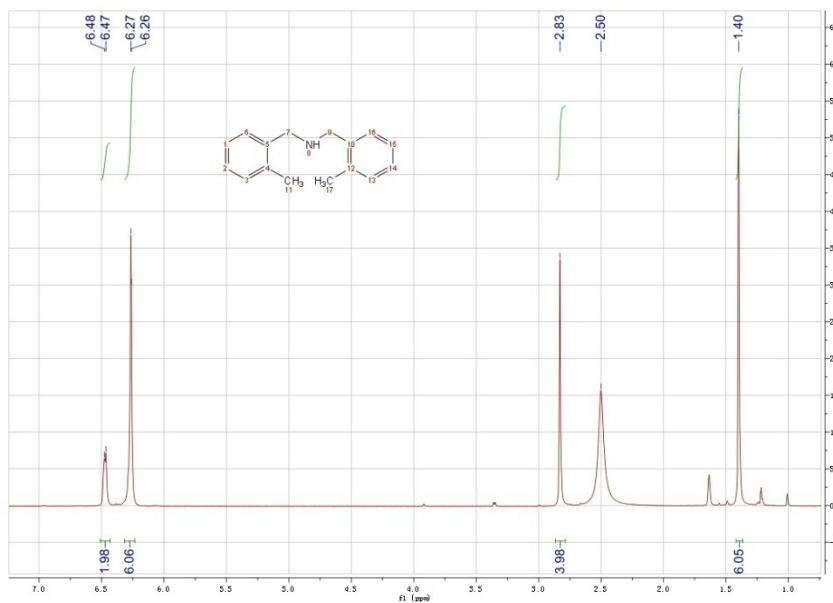

*di(2-methyl)benzylamine*:  $^{13}\text{C}$  NMR

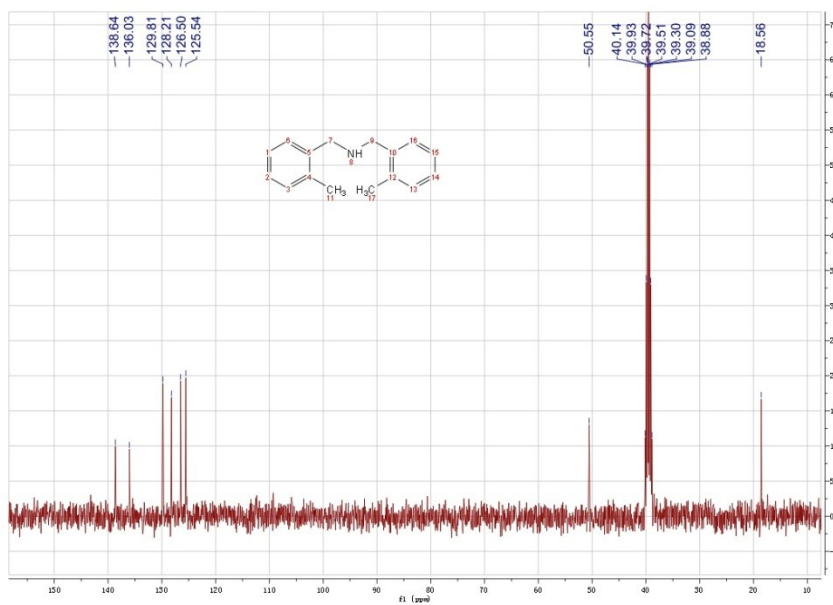

*di(3-methyl)benzylamine*:  $^1\text{H}$  NMR

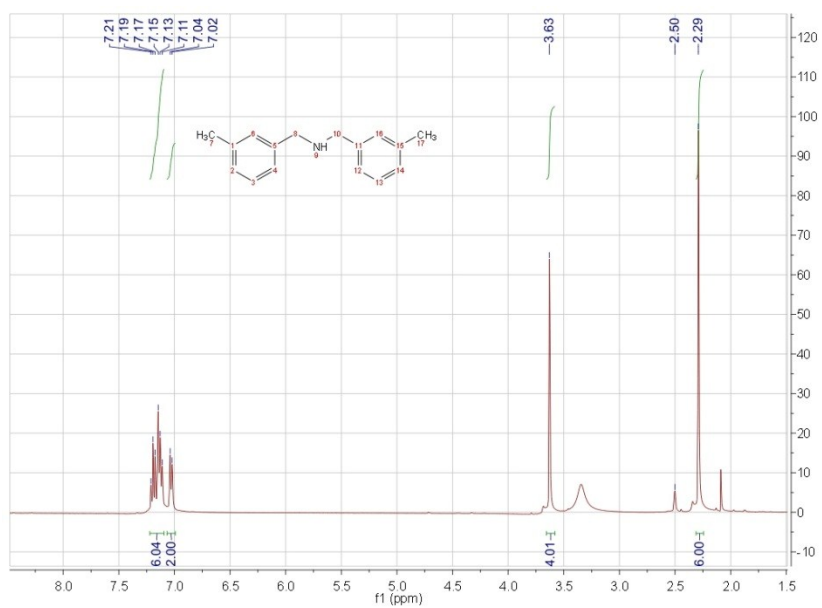

*di(3-methyl)benzylamine: <sup>13</sup>C NMR*

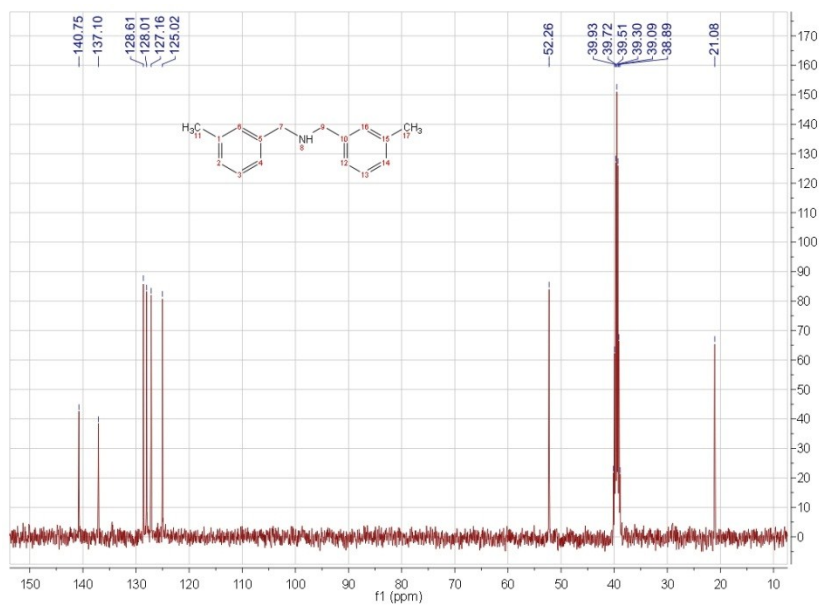

*bis(4-methylbenzyl)amine: <sup>1</sup>H NMR*



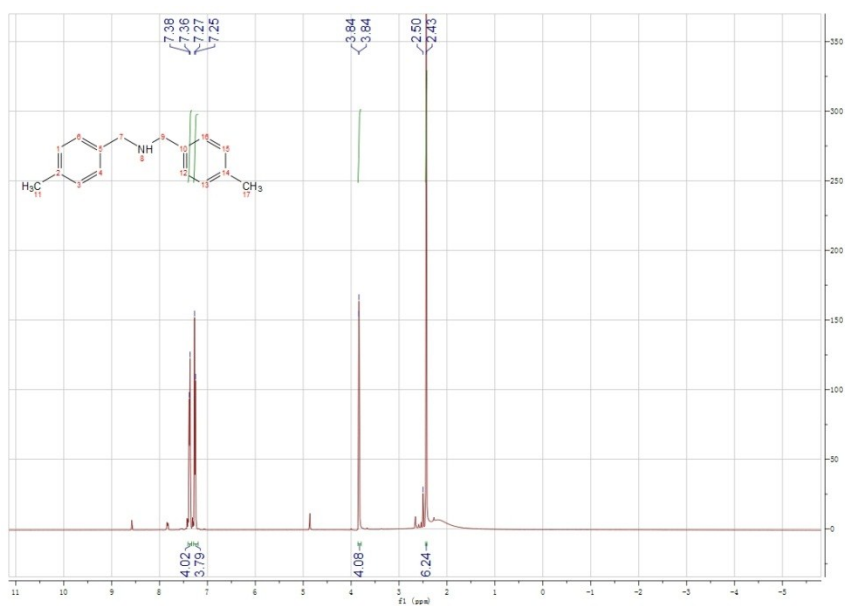

*bis(4-methylbenzyl)amine:  $^{13}\text{C}$  NMR*

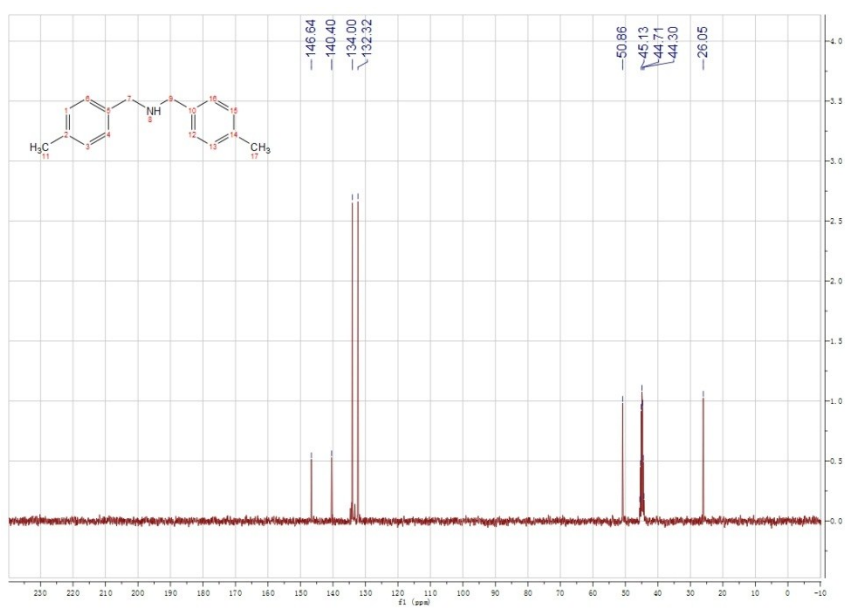

*bis(4-methoxybenzyl)amine:  $^1\text{H}$  NMR*

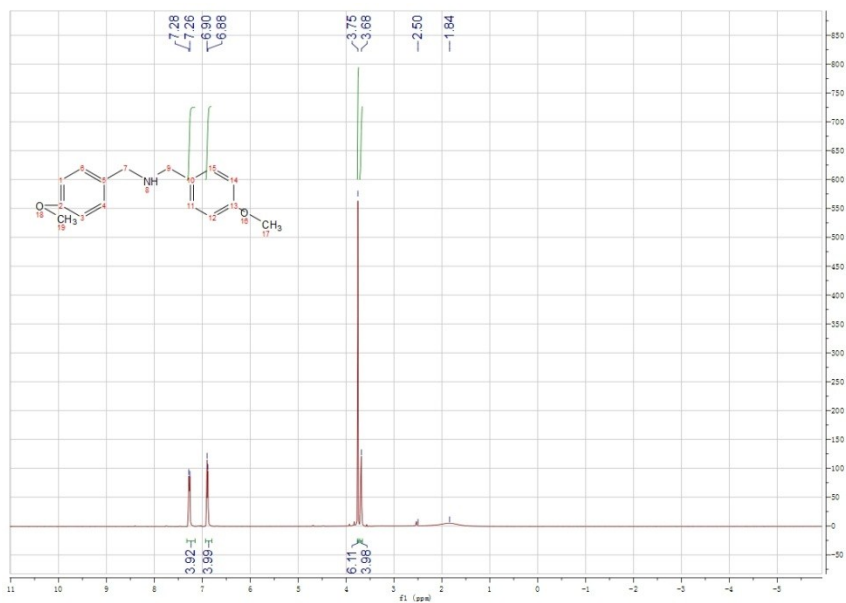

*bis(4-methoxybenzyl)amine*:  $^{13}\text{C}$  NMR

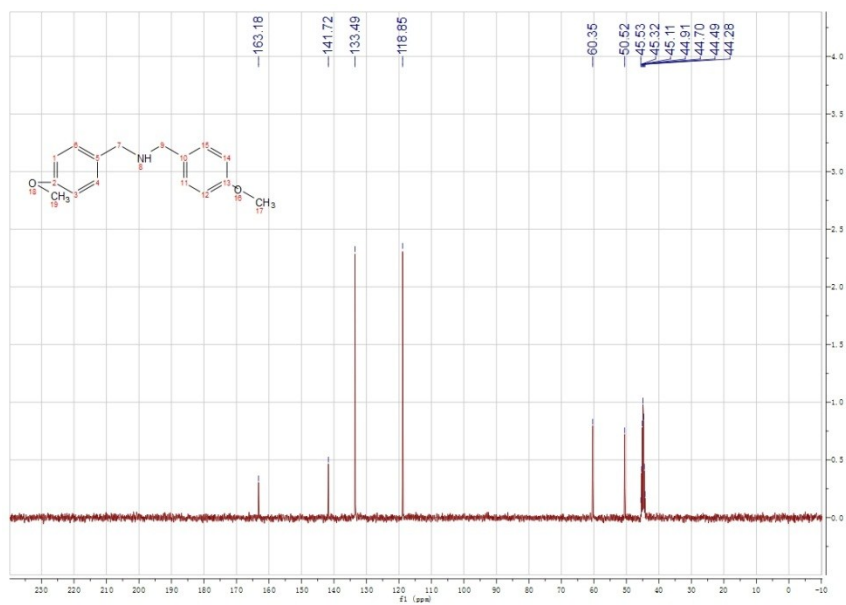

*bis(4-chlorobenzyl)amine*:  $^1\text{H}$  NMR

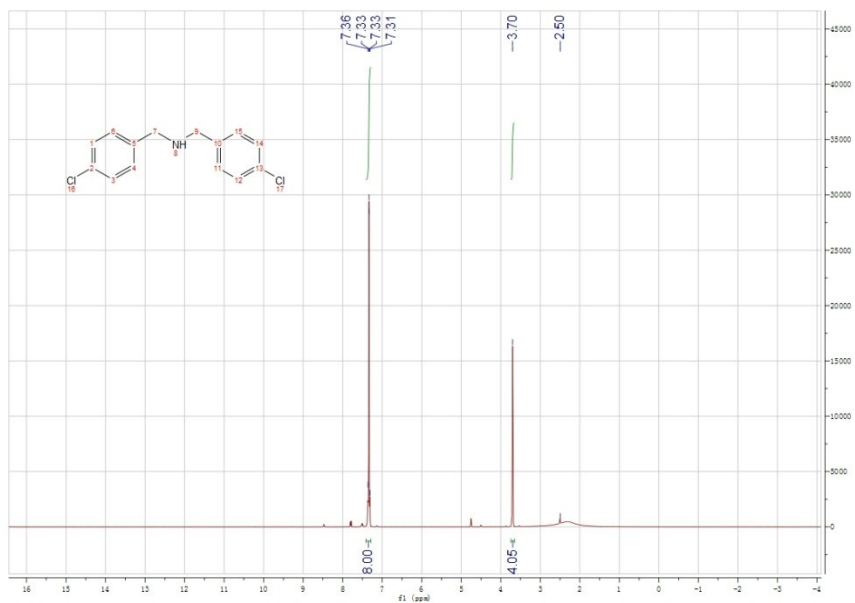

*bis(4-chlorobenzyl)amine:  $^{13}\text{C}$  NMR*

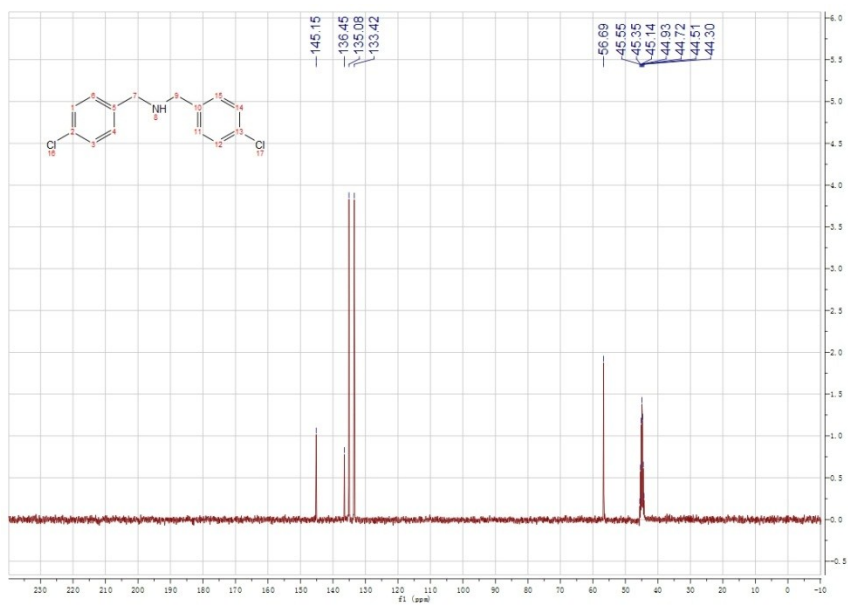

Supplement: c8ra00787j1.pdf [file c8ra00787j1.pdf]
